# Supplementary material for: Deoxycholic Acid and Risks of Cardiovascular Events, ESKD, and Mortality in CKD: The CRIC Study
Source: PubMed Central journal article supplement — Kidney Med. 2021 Nov 11;4(1):100387. doi: 10.1016/j.xkme.2021.09.004 (PMC8767130; doi:10.1016/j.xkme.2021.09.004), 2021-11-11
Supplement: mmc1.pdf [file mmc1.pdf]

**Figure S1.** Study population derived from the total CRIC Study population

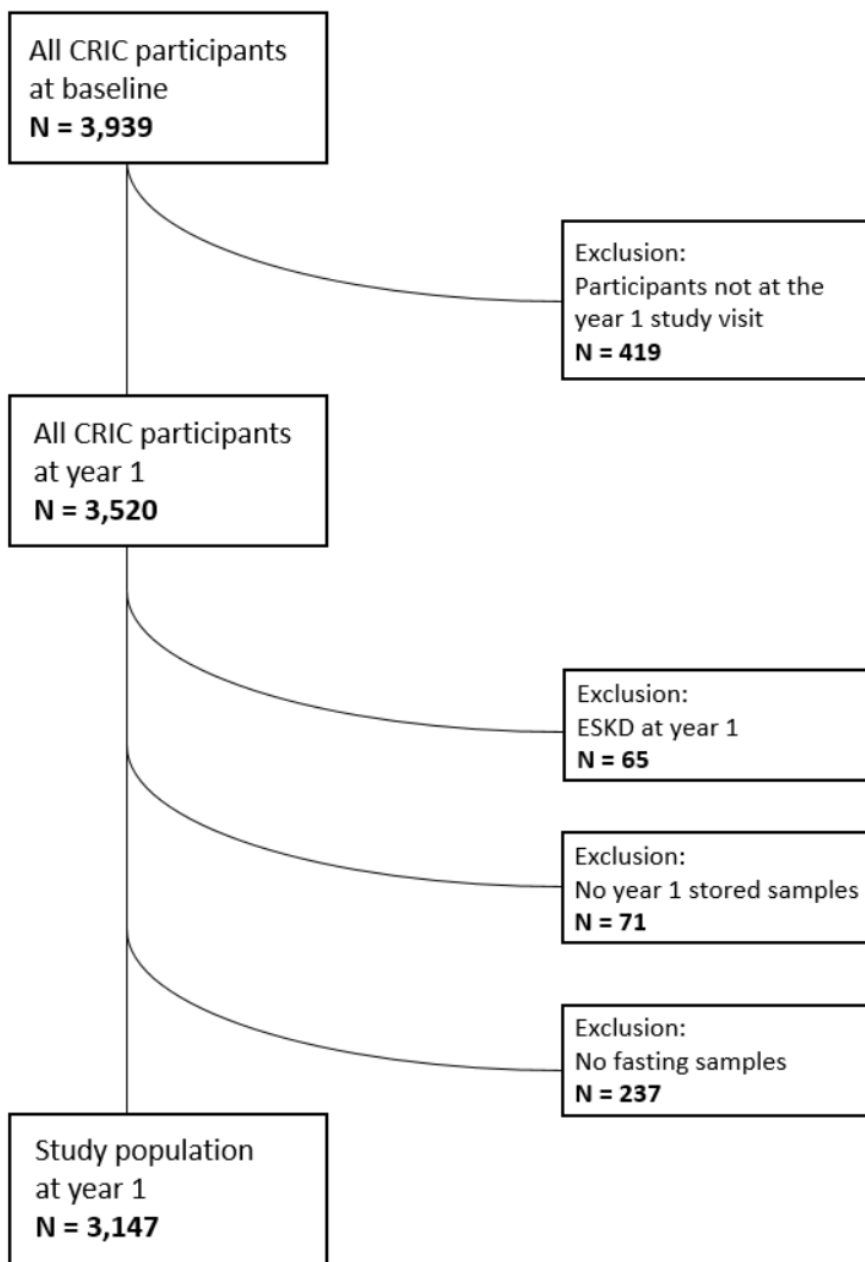

From the total CRIC Study population of 3,939 participants who completed the baseline visit, we excluded 419 participants who did not attend the year 1 CRIC Study visit because they died, were lost to follow-up, withdrew from the study, or missed the year 1 study visit. From the 3,520 people at the year 1 study visit, we excluded those who had progressed to ESKD, did not have a

*Frazier et al, Kidney Medicine, "Deoxycholic Acid and Risks of Cardiovascular Events, ESKD, and Mortality in CKD: The CRIC Study"*

stored sample available at the year 1 visit, or did not have a fasting sample. These exclusions yielded the final study population of 3,147 participants for our analysis.

Abbreviations: CRIC, Chronic Renal Insufficiency Cohort; DCA, deoxycholic acid; ESKD, end-stage kidney disease.

## **Item S1. Supplementary Methods**

Body weight, height, and blood pressure (BP) were measured using standard protocols.<sup>S1</sup>

Diabetes was defined as fasting glucose  $\geq 126$  mg/dl, non-fasting glucose  $\geq 200$  mg/dl, or the use of antidiabetic medications. Prevalent CVD was defined as self-reported coronary artery disease, heart failure, stroke, or peripheral artery disease. Hemoglobin, cholesterol, phosphate, calcium, magnesium, and serum albumin were measured using standard laboratory methods. Twenty-four-hour urinary protein was measured using the turbidometric method with benzethonium chloride. Total parathyroid hormone (PTH) was measured using the total PTH assay, which includes the 1-84 PTH molecule and 7-84 fragments assay (Scantibodies, Santee, CA).

Fibroblast growth factor 23 (FGF23) was measured by a second-generation C-terminal assay (Immutopics). High-sensitivity C-reactive protein (CRP) and interleukin-6 (IL-6) were measured using the particle-enhanced immunonephelometry method. Estimated glomerular filtration rate (eGFR) was calculated using the Chronic Kidney Disease Epidemiology Collaboration (CKD-EPI) equation.<sup>S2</sup>

Since DCA levels were measured from stored serum samples obtained at the year one follow up visit, most covariates were from this time point. IL-6 and CRP values were only available at the CRIC Study baseline visit. Markers of mineral metabolism were only available in subset of participants at the year one follow up visit, but were available in nearly all participants at the CRIC Study baseline visit. To handle missing data, when values were not available at the year one follow up visit, we used values from the CRIC Study baseline visit. Missing data from all covariates was  $< 2\%$  in the final analyses.

To examine the associations between dietary variables and DCA, we used data from the self-reported Dietary Health Questionnaire (DHQ) collected during the baseline study visit. We examined the bivariate associations between log-DCA and animal protein, plant protein, total fat, and saturated fat in the diet using Pearson correlations. We also investigated the effect of the sample age on our adjusted Cox models that examined DCA with the outcome variables. The age of the DCA sample was included in Model 5, which adjusted for factors in model 4 plus sample age.

**Table S1. Characteristics of all CRIC Study participants who attended the year 1 visit and of the participants included in the study population**

| Characteristics          | All CRIC participants at year 1<br>N = 3520 | Study population at year 1<br>N = 3147 | Excluded population at year 1<br>N = 373 |
|--------------------------|---------------------------------------------|----------------------------------------|------------------------------------------|
| Age, years               | 59 ± 11                                     | 59 ± 11                                | 58 ± 12                                  |
| Female, N (%)            | 1594 (45.3)                                 | 1427 (45.3)                            | 167 (44.8)                               |
| African American, N (%)  | 1469 (41.7)                                 | 1277 (40.6)                            | 192 (51.5)                               |
| Hispanic, N (%)          | 405 (11.5)                                  | 361 (11.5)                             | 44 (11.8)                                |
| Current smoking, N (%)   | 428 (12.2)                                  | 379 (12.0)                             | 49 (13.1)                                |
| BMI, kg/m <sup>2</sup>   | 32.1 ± 7.8                                  | 32.1 ± 7.8                             | 31.6 ± 7.9                               |
| Systolic BP, mmHg        | 127 ± 22                                    | 127 ± 22                               | 131 ± 23                                 |
| Diabetes, N (%)          | 1749 (49.7)                                 | 1510 (48.0)                            | 239 (64.1)                               |
| History of CVD, N (%)    | 1271 (36.1)                                 | 1099 (34.9)                            | 172 (46.1)                               |
| Total cholesterol, mg/dl | 182.0 ± 44.2                                | 182.3 ± 43.9                           | 179.4 ± 47.3                             |
| Statin use, N (%)        | 2082 (59.2)                                 | 1844 (58.6)                            | 238 (63.8)                               |

|                                 |                         |                         |                          |
|---------------------------------|-------------------------|-------------------------|--------------------------|
| Number of BP medications        | 2.5 ± 1.3               | 2.5 ± 1.3               | 2.8 ± 1.2                |
| eGFR, ml/min/1.73m <sup>2</sup> | 42.2 ± 16.0             | 42.5 ± 16.0             | 40.1 ± 15.8              |
| Urinary protein, g/24h          | 0.18<br>(0.07 – 0.95)   | 0.17<br>(0.07 – 0.89)   | 0.34<br>(0.09 – 1.51)    |
| Serum albumin, g/dl             | 4.04 ± 0.44             | 4.05 ± 0.44             | 3.95 ± 0.47              |
| Calcium, mg/dl                  | 9.29 ± 0.53             | 9.30 ± 0.51             | 9.20 ± 0.63              |
| IL-6, pg/ml                     | 1.85<br>(1.14 – 3.03)   | 1.83<br>(1.12 – 2.97)   | 2.03<br>(1.33 – 3.51)    |
| CRP, mg/dl                      | 2.51<br>(1.02 – 6.18)   | 2.48<br>(1.02 – 6.11)   | 2.73<br>(1.21 – 6.56)    |
| Phosphate, mg/dl                | 3.88 ± 1.03             | 3.87 ± 1.04             | 3.97 ± 0.93              |
| PTH, pg/ml                      | 62.0<br>(40.0 – 100.0)  | 61.0<br>(40.0 – 97.0)   | 68.3<br>(41.0 – 124.0)   |
| FGF23, RU/ml                    | 150.5<br>(95.4 – 281.3) | 147.0<br>(93.8 – 272.2) | 187.3<br>(116.7 – 358.0) |

Continuous variables are presented as mean  $\pm$  standard deviation for normally distributed data or as median and interquartile range for skewed data. Categorical variables are presented as total number and proportions.

Abbreviations: BMI, body mass index; SBP, systolic blood pressure; CVD, cardiovascular disease; SBP, systolic blood pressure; eGFR, estimated glomerular filtration rate; CRP, C-reactive protein; IL-6, Interleukin 6; PTH, parathyroid hormone; FGF23, fibroblast growth factor 23.

**Table S2. Associations of dietary protein and fat with log-DCA**

| Variable                            | N    | Pearson correlation coefficient | P value |
|-------------------------------------|------|---------------------------------|---------|
| Percent calories from fat           | 2424 | 0.026                           | 0.202   |
| Percent calories from saturated fat | 2424 | 0.029                           | 0.155   |
| Percent animal protein              | 2411 | -0.01878                        | 0.357   |
| Percent plant protein               | 2411 | 0.01878                         | 0.357   |

Bivariate linear correlations between dietary variables and log-DCA.



**Table S3. Associations of fasting DCA level with clinical outcomes, adjusted for age of sample<sup>a</sup>**

| <b>Atherosclerotic events</b>                              |                                           |                                           |
|------------------------------------------------------------|-------------------------------------------|-------------------------------------------|
|                                                            | <b>Below DCA median, &lt; 68.45 ng/ml</b> | <b>Above DCA median, &gt; 68.45 ng/ml</b> |
| Events / Total Number                                      | 261/1574                                  | 251/1573                                  |
| Mean follow-up time (year ± standard deviation)            | 6.9 ± 3.3                                 | 6.7 ± 3.3                                 |
| <b>Hazard ratio (95% CI) per SD of log-transformed DCA</b> |                                           |                                           |
| Unadjusted                                                 | 0.88 (0.56 – 1.37)                        | 1.83 (0.89 – 3.74)                        |
| Model 1 <sup>b</sup>                                       | 0.82 (0.53 – 1.28)                        | 1.49 (0.72 – 3.08)                        |
| Model 2 <sup>c</sup>                                       | 0.91 (0.58 – 1.43)                        | 1.48 (0.72 – 3.01)                        |
| Model 3 <sup>d</sup>                                       | 0.90 (0.57 – 1.42)                        | 1.58 (0.77 – 3.22)                        |
| Model 4 <sup>e</sup>                                       | 0.88 (0.56 – 1.40)                        | 1.52 (0.74 – 3.12)                        |
| Model 5 <sup>f</sup>                                       | 0.88 (0.55 – 1.39)                        | 1.52 (0.74 – 3.12)                        |
| <b>Heart failure events</b>                                |                                           |                                           |
|                                                            | <b>Below DCA median, &lt; 68.45 ng/ml</b> | <b>Above DCA median, &gt; 68.45 ng/ml</b> |
| Events / Total Number                                      | 303/1574                                  | 272/1573                                  |
| Mean follow-up time (year ± standard deviation)            | 7.1 ± 3.2                                 | 7.0 ± 3.2                                 |
| <b>Hazard ratio (95% CI) per SD of log-transformed DCA</b> |                                           |                                           |
| Unadjusted                                                 | 0.75 (0.50 – 1.13)                        | 1.58 (0.80 – 3.14)                        |
| Model 1 <sup>b</sup>                                       | 0.74 (0.49 – 1.12)                        | 1.40 (0.70 – 2.80)                        |
| Model 2 <sup>c</sup>                                       | 0.86 (0.56 – 1.31)                        | 1.40 (0.71 – 2.73)                        |
| Model 3 <sup>d</sup>                                       | 0.81 (0.53 – 1.24)                        | 1.29 (0.66 – 2.53)                        |

|                                                            |                                           |                                           |
|------------------------------------------------------------|-------------------------------------------|-------------------------------------------|
| Model 4 <sup>e</sup>                                       | 0.82 (0.54 – 1.27)                        | 1.22 (0.63 – 2.38)                        |
| Model 5 <sup>f</sup>                                       | 0.82 (0.53 – 1.26)                        | 1.22 (0.63 – 2.37)                        |
| <b>ESKD events</b>                                         |                                           |                                           |
|                                                            | <b>Below DCA median, &lt; 68.45 ng/ml</b> | <b>Above DCA median, &gt; 68.45 ng/ml</b> |
| Events / Total Number                                      | 456/1574                                  | 373/1573                                  |
| Mean follow-up time (year ± standard deviation)            | 6.9 ± 3.3                                 | 7.0 ± 3.1                                 |
| <b>Hazard ratio (95% CI) per SD of log-transformed DCA</b> |                                           |                                           |
| Unadjusted                                                 | 0.58 (0.41 – 0.81)                        | 1.24 (0.69 – 2.23)                        |
| Model 1 <sup>b</sup>                                       | 0.62 (0.44 – 0.88)                        | 1.33 (0.74 – 2.41)                        |
| Model 2 <sup>c</sup>                                       | 0.76 (0.54 – 1.08)                        | 2.12 (1.18 – 3.82)                        |
| Model 3 <sup>d</sup>                                       | 0.78 (0.55 – 1.12)                        | 2.21 (1.23 – 3.99)                        |
| Model 4 <sup>e</sup>                                       | 0.98 (0.68 – 1.40)                        | 2.67 (1.51 – 4.74)                        |
| Model 5 <sup>f</sup>                                       | 1.02 (0.71 – 1.46)                        | 2.76 (1.56 – 4.90)                        |
| <b>All-cause mortality events</b>                          |                                           |                                           |
|                                                            | <b>Below DCA median, &lt; 68.45 ng/ml</b> | <b>Above DCA median, &gt; 68.45 ng/ml</b> |
| Events / Total Number                                      | 408/1574                                  | 411/1573                                  |
| Mean follow-up time (year ± standard deviation)            | 8.1 ± 2.6                                 | 7.9 ± 2.6                                 |
| <b>Hazard ratio (95% CI) per SD of log-transformed DCA</b> |                                           |                                           |
| Unadjusted                                                 | 0.88 (0.63 – 1.24)                        | 2.36 (1.37 – 4.07)                        |
| Model 1 <sup>b</sup>                                       | 0.81 (0.58 – 1.15)                        | 2.05 (1.17 – 3.56)                        |
| Model 2 <sup>c</sup>                                       | 1.03 (0.72 – 1.46)                        | 2.12 (1.24 – 3.64)                        |

|                      |                    |                    |
|----------------------|--------------------|--------------------|
| Model 3 <sup>d</sup> | 0.98 (0.69 – 1.40) | 2.11 (1.23 – 3.64) |
| Model 4 <sup>e</sup> | 1.00 (0.70 – 1.43) | 2.13 (1.25 – 3.64) |
| Model 5 <sup>f</sup> | 1.03 (0.72 – 1.48) | 2.15 (1.26 – 3.66) |

<sup>a</sup>Abbreviations: DCA, deoxycholic acid; CI, confidence interval; SD, standard deviation; CVD, cardiovascular disease; ESKD, end-stage kidney disease.

<sup>b</sup>Model 1 stratified by study site and adjusted for age, sex, African American race and Hispanic ethnicity.

<sup>c</sup>Model 2 adjusted for: Model 1 + eGFR, log urinary protein, diabetes, SBP, number of antihypertensive medications, current smoking, history of cardiovascular disease, total cholesterol, and statin use.

<sup>d</sup>Model 3 adjusted for: Model 2 + log IL-6 and log CRP.

<sup>e</sup>Model 4 adjusted for: Model 3 + log FGF23, log PTH, phosphate, calcium and albumin.

<sup>f</sup>Model 5 adjusted for: Model 4 + sample age.

**Table S4. Associations between log-DCA and DCA predictors**

| Variable                 | N    | Unit/category                                            | Estimate (95% CI)          | Wald Chi-Square | <i>p-value</i> |
|--------------------------|------|----------------------------------------------------------|----------------------------|-----------------|----------------|
| Age                      | 3147 | Per 1 unit increase of age in years                      | 0.009<br>(0.004 – 0.014)   | 14.71           | 0.0001         |
| Gender                   | 3147 | Male                                                     | -0.084<br>(-0.178 – 0.009) | 3.16            | 0.0755         |
|                          |      | Female                                                   | Reference                  |                 |                |
| Race                     | 3147 | African American                                         | -0.089<br>(-0.186 – 0.008) | 3.25            | 0.0713         |
|                          |      | Other                                                    | Reference                  |                 |                |
| Ethnicity                | 3147 | Hispanic                                                 | 0.038<br>(-0.125 – 0.201)  | 0.21            | 0.6463         |
|                          |      | Other                                                    | Reference                  |                 |                |
| eGFR                     | 3147 | Per 1 unit increase of eGFR in ml/min/1.73m <sup>2</sup> | 0.005<br>(0.001 – 0.008)   | 6.28            | 0.0122         |
| BMI                      | 3144 | Per 1 unit increase of BMI in kg/m <sup>2</sup>          | 0.005<br>(-0.001 – 0.011)  | 2.49            | 0.1143         |
| Diabetes                 | 3147 | Yes                                                      | 0.097<br>(0.002 – 0.191)   | 4.04            | 0.0444         |
|                          |      | No                                                       | Reference                  |                 |                |
| Systolic BP              | 3147 | Per 1 unit increase of Systolic BP in mmHg               | 0.001<br>(-0.002 – 0.003)  | 0.26            | 0.6131         |
| Number of BP medications | 3147 | Per 1 unit increase of BP medications                    | -0.034<br>(-0.074 – 0.005) | 2.86            | 0.0908         |
| Current smoking          | 3147 | Yes                                                      | -0.065<br>(-0.197 – 0.067) | 0.92            | 0.3366         |
|                          |      | No                                                       | Reference                  |                 |                |
| History of CVD           | 3147 | Yes                                                      | 0.034<br>(-0.061 – 0.129)  | 0.49            | 0.4852         |
|                          |      | No                                                       | Reference                  |                 |                |

|                            |      |                                                    |                             |       |        |
|----------------------------|------|----------------------------------------------------|-----------------------------|-------|--------|
| Total cholesterol          | 3146 | Per 1 unit increase of total cholesterol in mg/dl  | -0.001<br>(-0.002 – 0.0002) | 2.6   | 0.1070 |
| Statin use                 | 3147 | Yes                                                | -0.157<br>(-0.250 – -0.064) | 11.04 | 0.0009 |
|                            |      | No                                                 | Reference                   |       |        |
| Log urinary protein, g/24h | 3123 | Per 1 unit increase of ln_urinary protein in g/24h | 0.019<br>(-0.016 – 0.054)   | 1.12  | 0.2898 |
| Log CRP, mg/dl             | 3143 | Per 1 unit increase of ln_CRP in mg/dl             | -0.041<br>(-0.080 – -0.003) | 4.46  | 0.0347 |
| Log IL-6, pg/ml            | 3104 | Per 1 unit increase of ln_IL6 in pg/ml             | 0.084<br>(0.028 – 0.140)    | 8.69  | 0.0032 |
| Log FGF23, RU/ml           | 3124 | Per 1 unit increase of ln_FGF23 in pg/ml           | -0.008<br>(-0.067 – 0.052)  | 0.06  | 0.8016 |
| Log PTH, pg/ml             | 3128 | Per 1 unit increase of ln_IL6 in pg/ml             | -0.010<br>(-0.083 – 0.063)  | 0.08  | 0.7841 |
| Phosphate                  | 3117 | Per 1 unit increase of phosphate in mg/dl          | -0.023<br>(-0.067 – 0.021)  | 1.06  | 0.3023 |
| Calcium                    | 3147 | Per 1 unit increase of calcium in mg/dl            | 0.017<br>(-0.080 – 0.113)   | 0.11  | 0.7370 |
| Serum albumin              | 3147 | Per 1 unit increase of serum albumin in g/dl       | 0.102<br>(-0.020 – 0.224)   | 2.68  | 0.1015 |

Tobit regression between log-DCA and independent variables. The Wald Chi-square value and p-value are from the Type III Analysis of Effects. We inferred strength of association between DCA and the variables based on the Chi-Square values.

Abbreviations: BMI, body mass index; SBP, systolic blood pressure; CVD, cardiovascular disease; BP, blood pressure; eGFR, estimated glomerular filtration rate; CRP, C-reactive protein; IL-6, Interleukin 6; PTH, parathyroid hormone; FGF23, fibroblast growth factor 23.

**References:**

- S1. Lash JP, Go AS, Appel LJ, et al. Chronic Renal Insufficiency Cohort (CRIC) Study: baseline characteristics and associations with kidney function. *Clinical journal of the American Society of Nephrology : CJASN*. 2009;4(8):1302-1311.
- S2. Levey AS, Stevens LA, Schmid CH, et al. A new equation to estimate glomerular filtration rate. *Ann Intern Med*. 2009;150(9):604-612.
